# Supplementary material
Source: publisher site journal article supplement (https://www.degruyterbrill.com/publication/isbn/9783839417294/downloadAsset/9783839417294_Leseprobe.pdf)
Supplement: Supplementary file 1 [file 9783839417294_Leseprobe.pdf]

**Aus:**

**DOROTHEE KIMMICH, SCHAMMA SCHAHADAT (Hg.)**

## **Kulturen in Bewegung**

**Beiträge zur Theorie und Praxis der Transkulturalität**

August 2012, 312 Seiten, kart., 29,80 €, ISBN 978-3-8376-1729-0

Sowohl der Begriff als auch die Vorstellung von »Kultur« verändern sich aktuell radikal. Intellektuelle aus allen Disziplinen sind damit befasst, eine Neubestimmung und -positionierung von »Kultur« vorzunehmen.

Im Zeitalter von Globalisierung und Migration ist die Vorstellung von einer zugleich an ein Volk, eine Nation und an einen spezifischen Ort gebundenen Kultur im Herder'schen Sinne offenbar obsolet geworden. Man versucht vielmehr, die Fluidität, die Dynamik und die Grenzüberschreitungen zwischen Kulturen zu begreifen. Die Beiträge in diesem Band zeigen, dass das Konzept der Transkulturalität, welches zunehmend sowohl die Interkulturalitäts-Studien als auch die Postcolonial Studies als kulturwissenschaftliches Paradigma ablöst, hierfür einen methodischen Ansatzpunkt bietet.

**Dorothee Kimmich** lehrt Neuere deutsche Literatur an der Universität Tübingen. **Schamma Schahadat** lehrt Slavische Literatur- und Kulturwissenschaft an der Universität Tübingen.

Weitere Informationen und Bestellung unter:

[www.transcript-verlag.de/ts1729/ts1729.php](http://www.transcript-verlag.de/ts1729/ts1729.php)

# Inhalt

---

## **Einleitung**

Dorothee Kimmich/Schamma Schahadat | 7

## **I. KONZEPTUALISIERUNGEN**

### **Was ist eigentlich Transkulturalität?**

Wolfgang Welsch | 25

### **Lob des »Nebeneinander«**

Zur Kritik kulturalistischer Mythen  
bei Kafka und Wittgenstein

Dorothee Kimmich | 41

### **Kosmopolitismus**

#### **in der Diskurslandschaft der Postmoderne**

Galin Tihanov | 69

### **Überlegungen zu einer Literaturgeschichte als Verflechtungsgeschichte**

Annette Werberger | 109

## **II. REALISIERUNGEN**

### **Heidnisches und Christliches in einer altirischen Erzählung vom Irdischen Paradies**

Bernhard Maier | 145

### **Erziehungswissenschaftliche Perspektiven auf den pädagogischen Umgang mit Ambivalenz**

S. Karin Amos/Rainer Treptow | 163

### **Transkulturelles Strafrecht**

Joachim Vogel | 195

### **Lisboa – Maputo – Berlin**

Ein transkulturelles Musikprojekt  
am Goethe-Institut in Lissabon 2006-2008  
Ronald Grätz | 219

## **III. TRANSKULTURELLE LITERATUR**

### **Kakanien der neuen Generation**

Zentraleuropa zwischen  
Transkulturalität und Differenz  
Renata Makarska | 235

### **T.S. Eliot und das Transkulturell-Erhabene**

Lars Eckstein/Günter Leypoldt | 261

### **Verwackelte Perspektiven**

Kritische Korrelationen in der zeitgenössischen  
arabisch-amerikanischen Kulturproduktion  
Markus Schmitz | 279

**Autorinnen und Autoren** | 303

# Einleitung

---

DOROTHEE KIMMICH/SCHAMMA SCHAHADAT

Den Ausgangspunkt zu einem Buch mit dem Titel *Kulturen in Bewegung* bildet die Beobachtung, dass sowohl der Begriff als auch die Vorstellung von »Kultur« sich im Moment radikal verändern und dass Intellektuelle aus allen Disziplinen damit befasst sind, eine Neubestimmung und -positionierung von »Kultur« vorzunehmen. Im Zeitalter von Globalisierung und Migration ist die Vorstellung von einer zugleich an ein Volk, eine Nation und an einen spezifischen Ort gebundenen Kultur im Herderschen Sinne offenbar obsolet geworden. Man versucht vielmehr, die Fluidität, die Dynamik und die Grenzüberschreitungen zwischen Kulturen zu begreifen. Ein Begriff, der auf diese Situation reagiert, ist der der Transkulturalität. Als kulturwissenschaftliches Paradigma löst er sowohl das Konzept der Interkulturalität als auch die Prämissen der *Post Colonial Studies* der 1990er Jahre ab.

Zurückführen lässt sich der Begriff auf den kubanischen Ethnologen Fernando Ortiz, der bereits 1940 in seinem Hauptwerk *Contrapunteo cubano del tabaco y azúcar* den (dynamischen) Begriff der Transkulturation prägte. Die Wiederaufnahme von Ortiz' Konzept durch Mary Louise Pratt in ihrer einflussreichen Studie *Imperial Eyes: Travel Writing and Transculturation* aus dem Jahr 1992 brachte den Begriff der Transkulturation einer breiten akademischen Öffentlichkeit nahe und trug zu dessen Verbreitung vor allem innerhalb der Geisteswissenschaften bei. Hier wurde der Begriff der Transkulturation im Laufe der 1990er Jahre sukzessive zum Konzept der Transkulturalität weiterent-

wickelt. Dies geschah im deutschsprachigen Raum vorwiegend in Auseinandersetzung mit der philosophischen (vgl. z.B. Wolfgang Ivers), soziologischen (vgl. z.B. Ulrich Beck) und anthropologischen (vgl. z.B. Ulf Hannerz) Globalisierungsforschung.

Grundlegend ist hier die Erkenntnis, dass in einer globalisierten Welt Kulturen weder territorial verortet werden können noch an homogene Gemeinschaften gebunden sind. Das Konzept der Transkulturalität erlaubt es, sich programmatisch vom überkommenen Denkansatz der Interkulturalitätsforschung zu verabschieden: Während die Interkulturalitäts-Forschung Kulturen als »Inseln oder Sphären« (Ivers 1999: 96) begreift, in denen es lediglich an den kulturellen Außengrenzen zu Austauschprozessen oder eben auch, in der populären Rhetorik Samuel Huntingtons, zu gewalttätigen Zusammenstößen (*clashes*) kommt, postuliert Transkulturalität eine Öffnung, Dynamisierung und vielfältige wechselseitige Durchdringung der Kulturen. Globale Kulturen, so der Ausgangspunkt, zeichnen sich durch ihre Fluidität, Grenzverschiebung bzw. -aufhebung aus und entwickeln dabei auch neue Strategien des Ein- und Ausschlusses. Damit gehen auch neue Beschreibungsformen für bisher nicht benennbare Kategorien von Kultur einher: Es entstehen Neologismen, so zum Beispiel *ethno-space*, *media-space*, *techno-space* (Arjun Appadurai), die den transkulturellen Anforderungen gerecht werden sollen. Diese Begriffe versuchen insbesondere, neue Raumvorstellungen zu erfassen bzw. zu prägen, um damit die Dynamik und Komplexität moderner transkultureller Gesellschaften zu beschreiben.

Der Begriff der Transkulturalität verspricht, nicht nur den der Inter- oder Multikulturalität, sondern auch den des Postkolonialismus abzulösen; dem Zeitalter der Kolonialisierung und der Dekolonialisierung wird keine historische Sonderstellung mehr eingeräumt. Vielmehr geht es nun darum, Transkulturalität mit einer neu konfigurierten historischen Tiefe zu erarbeiten, das heißt neuzeitliche, aber auch antike und mittelalterliche Prozesse ebenso ins Auge zu fassen wie die der Moderne und der Globalisierung. Aus der Perspektive der Transkulturalität lassen sich politische und kulturelle Landschaften erforschen, die traditionell nicht oder nur selten im historischen Rahmen von Kolonisation und Dekolonisierung thematisiert und erforscht wurden, wie etwa Zentralasien oder Ostmitteleuropa, aber auch die Geschichte(n) von Japan, Korea und China sind hier zu erwähnen.

Ein transkultureller Forschungsansatz führt so auch zu einer stärkeren Annäherung an die »Trans Area Studies« (Ottmar Ette),<sup>1</sup> die der Erforschung trans- und postnationaler Räume besser gerecht werden als die traditionellen Area Studies. Area Studies sind im politischen Kontext des Kalten Krieges entstanden, um Spezialisten auszubilden, die möglichst genaue Kenntnisse über den Feind, seine Sprache und seine Kultur haben.<sup>2</sup> »Trans Area Studies« sollen das Bedürfnis nach Wissen, das quer durch die Kulturen geht – der Zeit nach dem Ende des Kalten Krieges angemessen – repräsentieren.

Während der Beginn der Transkulturalitäts-Debatte durch ihre Verknüpfung mit dem Globalisierungsdiskurs vornehmlich politologisch und ökonomisch geprägt war, hat sich in letzter Zeit eine Öffnung hin zu den Literatur- und Kulturwissenschaften ergeben. Wenn Gayatri Spivak fordert, die Geschlossenheit der Area Studies ebenso wie die der Vergleichenden Literaturwissenschaften aufzugeben, Sprachen (und Kulturen) als hybrid wahrzunehmen und Literaturen und Kulturen, die aus politischer Perspektive bedeutungslos erscheinen (»nonhegemonic«), in den Lehrplan der Komparatistik und der Area Studies mit aufzunehmen, dann entspricht das im Feld der Literatur-

- 
- 1 Der Romanist Ottmar Ette hat den Begriff der Trans Area Studies in verschiedenen Vorträgen verwendet; er leitet das Netzwerk POINTS (Potsdam International Network for TransArea Studies, <http://www.uni-potsdam.de/tapoints/>); auf der Homepage ist auch sein neues Buch *Trans Area. A Literary History of Globalization* für Mai 2012 bei de Gruyter angekündigt.
  - 2 Spivak zitiert in diesem Zusammenhang einen Text der Ford Foundation von 1947, die eine der Stiftungen war, die die Einrichtung der Area Studies finanziert haben: »To meet the demands of war, scholars of diverse disciplines were forced to pool their knowledge in frantic attempts to advise administrators and policy makers ... The war also showed the need for trained personnel for most foreign areas.« (zit. in Spivak 2003: 7) Bis heute, so Spivak, »Area Studies exhibit quality and rigor [...] They are tied to the politics of power, and their connections to the power elite in the countries studied are still strong; the quality of the language learning is generally excellent [...]« (Ebd.)

wissenschaften dem gegenwärtigen Interesse an einem erweiterten Begriff von Weltliteratur.<sup>3</sup>

## **DIE RÄNDER DER TRANSKULTURALITÄT: *BLACK ATLANTIC*, TRANSMIGRANTEN, *CROSSING BORDERS***

Bevor wir kurz auf die einzelnen Beiträge des vorliegenden Bandes eingehen, die in unterschiedlichen diskursiven Kontexten einen transkulturellen Blick erproben, wollen wir einige Schlüsselkonzepte von entscheidendem Einfluss auf die transkulturelle Theoriebildung vorstellen: Paul Gilroys Konzept vom *Black Atlantic*,<sup>4</sup> Nina Glick Schillers, Linda Baschs und Cristina Szanton-Blancs Definition des »Transmigranten« und Gayatri Spivaks Idee von der Grenzüberschreitung, dem *Crossing Borders*.<sup>5</sup> Eine zentrale Rolle in all diesen Konzepten spielt der Raum, der durch eine eigene Dynamik bzw. durch die sich darin bewegenden Menschen geprägt ist; mit Michel de Certeau gesprochen: »Der Raum ist ein Ort, mit dem man etwas macht.« (de Certeau 1988: 218) Transkulturelle Konzepte heben die Dynamik und Unruhe im Raum und die damit verbundene Kreativität hervor.<sup>6</sup> Raum wird also nicht statisch und ahistorisch und damit im Gegensatz zu Geschichte und Zeit konzipiert; vielmehr wird in den transkulturellen

---

3 Mit dem Thema Weltliteratur befassen sich Galin Tihanov (der auch auf die Komparatistik eingeht) und Annette Werberger in diesem Band.

4 Wir beziehen uns hier nicht auf das mittlerweile zu einem Klassiker avancierten Buch *The Black Atlantic*, sondern auf einen Aufsatz, der 2004 in einem Sammelband mit dem Titel *Der Black Atlantic* (hg. vom Haus der Kulturen der Welt, Berlin) erschienen ist und der zentrale Punkte des Buches enthält. (Gilroy 2004)

5 Alle drei Texte bzw. Auszüge davon werden in dem Band *Transkulturalität*, hg. von Andreas Langenohl, Ralph Poole und Manfred Weinberg, im Herbst 2012 bei transcript in der Reihe »basis-scripte« (Band 3) in deutscher Übersetzung erscheinen.

6 Auf die Kreativität in einem Raum, der durch Mobilität und Flexibilität geprägt ist (im Gegensatz zu einem Raum, in dem Menschen oder Nationen sesshaft sind), verweist Gilroy 2004: 13.

Konzepten der Versuch unternommen, dem Raum Dynamik und Wandel und damit eine eigene Dimension von Geschichte einzuschreiben. Damit gehört die Debatte um Transkulturalität auch in den Kontext des *spatial turn*, dessen Konjunktur seit den 90er Jahren des vergangenen Jahrhunderts kaum abgeflacht ist. Dies hat verschiedene Gründe, die bis weit in die Theoriedebatten des 20. Jahrhunderts hineinreichen und damit selbstverständlich auch für die Diskussionen über die verschiedenen Labels wie Postkolonialismus, Inter- oder Transkulturalität den historischen Hintergrund liefern.

Obleich mit einem englischen Begriff als *spatial turn* benannt, wurde die transdisziplinäre Raumdebatte vor allem in den deutschsprachigen Kulturwissenschaften seit Mitte der 1990er Jahre sehr intensiv geführt. Das Schlagwort »Wiederkehr des Raumes« bezieht sich dabei allerdings zumeist auf den Import von Ansätzen und Konzepten aus der französisch- und englischsprachigen Soziologie und Stadtgeographie, auf Studien über die menschliche Projektion und Zurichtung von Räumen.<sup>7</sup>

Anfang 1967 äußerte sich Michel Foucault programmatisch zum Thema Raum:<sup>8</sup> Hierbei, so stellte er einleitend fest, handele es sich offenkundig um ein besonderes Anliegen des ausgehenden 20. Jahrhunderts. Während das 19. Jahrhundert nämlich noch ganz im Zeichen der Geschichte gestanden habe, ließe sich »[u]nsere Zeit [...] eher als Zeitalter des Raumes begreifen«. (Foucault 2005: 931) Nachdem das abendländische Bild der Welt im 19. Jahrhundert primär im Sinne eines zeitlichen Nacheinander organisiert gewesen sei, werde es nun zunehmend als räumliches Nebeneinander strukturiert. Die »ideologischen Konflikte« innerhalb der zeitgenössischen akademischen Debatten, so Foucault, könnten als eine Konfrontation »zwischen den frommen Abkömmlingen der Zeit und den hartnäckigen Bewohnern des

---

7 Zu Recht hat Karl Schlögel diese Schlagseite des Denkens in ihrer raumkundlichen Version als Versuch des Ausweichens vor nationalsozialistischen Kategorien von Raum und Körper charakterisiert. (Schlögel 2003: 7ff.)

8 Der Vortrag »Des espaces autres« wurde am 14. März 1967 im Pariser Cercle d'études architecturales gehalten. Nachdem Foucault das unbearbeitete Manuskript kurz vor seinem Tod zur Publikation freigegeben hatte, erschien es posthum in der Zeitschrift *Architecture, Mouvement, Continuité* 5 (1984), 46-49.



Raumes« (Foucault 2005: 931) verstanden werden, das heißt als das Aufeinanderprallen zweier Episteme an einer Epochenschwelle: Die Ablösung von postkolonialen Paradigmen durch das Konzept der Transkulturalität gehört ganz offensichtlich zu diesem Bruch zwischen zwei »Epistemen«.

In den 1980er Jahren hat sich tatsächlich eine zunehmende Veräumlichung des Denkens manifestiert. Dabei sollte nicht grundsätzlich das hierarchische Verhältnis zwischen Zeit und Raum umgekehrt werden, sondern vielmehr werden nun beide Faktoren in ihrem Zusammenwirken beleuchtet. Das Ideal ist »eine flexiblere und ausbalanciertere kritische Theorie, die das Machen von Geschichte mit der gesellschaftlichen Produktion von Raum, mit der Konstruktion und Konfiguration von menschlichen Geographien neu verknüpft.« (Soja 1991: 75) Raum ist jedenfalls keine vorfindliche Kondition von Wahrnehmung und Erfahrung mehr, wie es die philosophische Tradition der Raumtheorie von Platon über Descartes bis Newton noch annahm. Es geht heute vielmehr um das Verhältnis von sozialem und physischem Raum. Der Raum als Störung und Kondition des Menschen und damit auch des Menschlichen bleibt.

Anders als die Theorie der Zeit hat eine Theorie des Raums in der Philosophie nie einen prominenten Platz beansprucht. Während ›Zeit‹ und ›Geist‹ assoziiert wurden, wurde Raum in Zusammenhang mit Dingen und Körpern gebracht. ›Zeit‹ steht immer für Geschichte, Fortschritt und Entwicklung, während Raum mit Statik assoziiert wurde. »Während die Zeit für das Mobile, Dynamische und Progressive, für Veränderung, Wandel und Geschichte steht, steht der Raum für Immobilität, Stagnation und das Reaktionäre, für Stillstand, Starre, Festigkeit.« (Schroer 2006: 21) Erst die in den letzten Jahren viel rezipierten Thesen von Jurij Lotman<sup>9</sup> verleihen dem Raumdenken andere – kultursemiotische – Aspekte: »Raum wird geradezu zu einer Metapher für kulturelle Dynamik: durch Grenzüberschreitungen und Grenzverlagerungen, durch Verhandlungen, durch Migration und Überlappung.« (Bachmann-Medick 2006: 297).

An diese neuen Raum-Konzepte knüpfen die Theorien der Transkulturalität an. Sie gehören damit – anders als der Postkolonialismus und auch noch die Interkulturalität – zu einem »chronischen« und nicht zu einem »chthonischen« Raumdispositiv. Paul Gilroys Konzept

---

9 Siehe dazu z.B. sein Modell der Semiosphäre in Lotman 2010: 163-292.

vom *Black Atlantic* verbindet das räumliche Denken mit dem Denken von Kultur; dafür nutzt er die Metapher des Ozeans, um einerseits Eindeutigkeit außer Kraft zu setzen und andererseits »die Beziehung von Kultur zum Ort« (Gilroy 2004: 22) zu überdenken.<sup>10</sup> Die Sklaverei und die damit verbundenen Reisen über den Atlantik zwangen Menschen aus den verschiedensten (afrikanischen) Kulturen zusammen, diese vermischten sich, brachten alte Traditionen mit und griffen neue auf, und das Ergebnis war eine »komplexe kulturelle Neuformierung« (ebd.: 13). Damit entstand eine Kultur, die der Vorstellung einer Nationalkultur zuwider lief und die zwar im Raum stattfindet, sich aber vom spezifischen Ort trennt:

»Die Kulturen des *Black Atlantic* [...] artikulieren ästhetische und gegen-  
 ästhetische Formen und eine spezifische Dramaturgie des Erinnerns, die auf  
 charakteristische Weise Genealogie von Geografie und Lebensraum von Zuge-  
 hörigkeit trennt.« (Ebd.: 22)

»Synkretismus«, »Konglomerat«, »kulturelle Adaption und Verschmelzung«, »Neukombination«, »hybride Form« (ebd.: 15) sind die Begriffe, die Gilroy einsetzt, um die Kultur des *Black Atlantic* zu beschreiben. Dabei ist die sich aus den (macht)politischen Bedingungen ergebende kulturelle Ambivalenz, so kreativ sie auch sein mag, nicht nur positiv: Ist das Ergebnis des *Black Atlantic* ein »selbstbewusster« und »aufsässiger« »bastard« (ebd.), so zeigen sich dafür »Brüche und Risse, die durch Exil, Verlust, Brutalität, Stress und erzwungene Trennung« (ebd.: 17) hervorgerufen werden. Die »*spatial dislocation*« (ebd.) zieht nicht nur Kreativität, sondern auch Angst nach sich. »Trost [wird] durch die Vermittlung von Leiden geschaffen.« (Ebd.: 22) Gilroys Konzept des *Black Atlantic* eröffnet eine wichtige Perspektive für transkulturelles Denken, denn es erinnert daran, dass Kulturen nicht in einem machtfreien Raum entstehen, sondern dass die Kehrseite der viel gepriesenen kulturellen Fluidität Vertreibung, Flucht, Armut, Heimatlosigkeit, Gewalt und Tod ist.

---

10 Das erinnert an Welschs Idee, dass Kulturen heute keine »Inseln« mehr sind – der riesige, auch unbeherrschbare Ozean, der ständig in Bewegung ist, steht diesen abgeschlossenen Inseln entgegen, ist eine Art Schmelztiegel, in dem die verschiedenen Kulturen ineinander laufen (vgl. Welsch 1999).

Nina Glick Schiller, Linda Basch und Cristina Blanc-Szanton gehen in ihrem Konzept vom »Transmigranten« – dessen großes Plus sie darin sehen, dass er nicht nur in einer, sondern in zwei Kulturen dauerhaft verankert ist – von einem Übergangsritual aus, das mit der Migration verbunden ist. Sie grenzen diesen Typus des Migranten aber explizit von einem Szenario des leidenden Heimatlosen ab: »Heute [...] neigen Migranten immer mehr dazu, Netzwerke, Aktivitäten und Lebensmuster zu schaffen, die sowohl ihre Gast- als auch ihre Heimatgesellschaften umfassen.« (Glick Schiller/Basch/Blanc-Szanton 1997: 81) Soziale Netze funktionieren mithilfe einer Logik der Gabe und des Tauschs, denn sowohl Geschenke im familiären Verbund als auch ein »System legalisierten Austauschs« (ebd.: 85) sorgen dafür, dass die Transmigrant/-innen an zwei Kulturen partizipieren.

Mit der Figur des Transmigranten und einem dynamischen Modell, das sie als »Transnationalismus« bezeichnen, wenden sich Glick Schiller, Basch und Blanc-Szanton gegen statische sozialwissenschaftliche und anthropologische Konstrukte von Gruppen, die als geschlossene Einheiten betrachtet werden. (Vgl. ebd.: 87) Ihr eigenes Modell betten sie in ein »globales kapitalistisches System« einschließlich »differentieller Gewalt und Ungleichheit« (ebd.: 90) ein, an dem die Transmigranten teilhaben; in diesem Modell, wie in dem des *Black Atlantic*, bestimmt ein ökonomischer Rahmen (hier der »Weltkapitalismus«, dort die Sklaverei) das ungleiche Kräfteverhältnis zwischen den transkulturellen Akteuren. Wesentlich ist dabei jedoch, dass die heutigen Transmigranten im Vergleich zur Vergangenheit nicht mehr nur Opfer in der Fremde sind, sondern zudem ein kreatives Potential besitzen, da sie »fluide und multiple Identitäten« (ebd.: 94) ausbilden. Transmigranten, so die Schlussfolgerung, stellen »eine Herausforderung an unsere gegenwärtigen Formulierungen von nationalen Projekten dar«. Grenzbeziehungen zwischen »eigen« und »fremd« scheinen immer problematischer zu werden, ohne dabei allerdings ganz zu verschwinden.

Während Theorien der Transkulturalität, des *Black Atlantic* oder der Transmigration die Bewegung im Raum beobachten, blenden sie eine wichtige Station aus: die Grenze. Gilroys Atlantik wäscht diese Grenze buchstäblich weg und transkulturelle Modelle lassen die Grenze hinter sich. Dennoch bilden die Grenze, die Grenzmarkierung und damit auch die Grenzüberschreitung die Folie für einen utopischen Entwurf eines grenzenlosen, transkulturellen Raums. Gayatri Chakravorty Spivak befasst sich in ihrem Buch *Death of a Discipline* – das

der Disziplin der Komparatistik (*Comparative Literature*) gewidmet ist – mit der Grenzüberschreitung zwischen den Disziplinen und innerhalb der Komparatistik, einem per se grenzüberschreitenden Fach. Ausgehend von Derridas Bemerkung, dass Grenzüberschreitungen eine »problematische Angelegenheit« (»a problematic affair«, Spivak 2003: 16) sind, stellt sie fest, dass manche Grenzüberschreitungen problematischer sind als andere:

»borders are easily crossed from metropolitan countries, whereas attempts to enter from the so-called peripheral countries encounter bureaucratic and policed frontiers, altogether more difficult to penetrate.« (Ebd.)

Das gilt nicht nur für Menschen, die eine Staatsgrenze überschreiten, sondern auch für Sprachen und Literaturen, die »kulturelle« Grenzen überqueren wollen. Spivak bezeichnet die Ausgrenzung »subalternen« Kulturen aus dem scheinbar offenen transkulturellen Raum als »restricted permeability of global culture«, begrenzte Durchlässigkeit der globalen Kultur. (Ebd.) Spivak erinnert uns daran, ebenso wie Gilroy und Glick Schiller, Basch, Szanton-Blanc, dass Modelle von Transkulturalität, die Offenheit, Dynamik und Beweglichkeit feiern, auch die Schattenseiten zu berücksichtigen haben: ökonomische, politische und rassistische Strategien der Exklusion.

Letztlich stellt sich also die Frage, ob nicht auch das Konzept der Transkulturalität, das auf Dynamik und Offenheit zwischen Kulturen setzt, nicht dem Kulturalismus verfällt. Es bleibt schließlich wahrscheinlich, dass kein einziges Problem, kein einziger Konflikt transkultureller Dynamik tatsächlich auf »kulturelle« Gründe zurückzuführen ist, sondern dass es jeweils ökonomische, soziale oder politische Gründe sind, die Kulturkonflikte auslösen. Transkulturalität wäre dann eine systemische Bedingung für das Überleben von Kultur(en). Der Versuch, transkulturelle Dynamiken in positive und negative Aspekte einzuteilen, wäre nichts anderes als der gescheiterte aufklärerische Versuch, humanistischen Universalismus und einen potentiell rassistischen Relativismus zu vereinen. Letztlich provoziert der Transkulturalismus die Frage, ob es nicht das Konzept »Kultur« selbst ist, das man aufgeben muss, um den Anforderungen der Gegenwart gerecht zu werden. Das allerdings wird nicht allgemein, sondern in den verschiedenen wissenschaftlichen sozialen und politischen Diskursen entschieden werden müssen.

## KULTUREN IN BEWEGUNG: DIE BEITRÄGE

Im vorliegenden Band werden *Kulturen in Bewegung* aus den verschiedensten disziplinären Perspektiven betrachtet, wobei *Teil I, Konzeptualisierungen*, unterschiedliche theoretische Zugänge zum Thema umfasst und dabei Begriffe aus dem semantischen Feld der Transkulturalität betrachtet: den der Transkulturalität selbst, den des Kosmopolitismus, des Multikulturalismus und der Weltliteratur. Der Beitrag von *Wolfgang Welsch* führt in das Thema ein; Kulturen, so Welschs These, sind heute anders, nicht mehr voneinander abgegrenzt, sondern geprägt von »Durchdringungen« und »Verflechtungen« – der Begriff und das Konzept der Transkulturalität versucht, dieser durch Migration und Globalisierung bzw. Hybridisierung geprägten Wirklichkeit gerecht zu werden, und schreibt gegen das »alte Kulturmodell und seine [...] Differenz-Fiktion« an.<sup>11</sup> Welschs Entwurf einer Transkulturalität hat ein utopisches Potential: »Vielleicht kommen wir im Zeitalter der Transkulturalität tatsächlich dem alten Traum von einer ›Family of Man‹ ein Stück näher«,<sup>12</sup> heißt es abschließend.

Auch *Dorothee Kimmich* nähert sich der Transkulturalität zunächst auf konzeptueller Ebene, indem sie den Begriffen einer »Leitkultur« und dem der »Multikulturalität« nachgeht: »Multikulti ist gescheitert«, so die deutsche Bundeskanzlerin – ein Befund, der sich bei näherer Betrachtung als Furcht vor einem radikalen Islamismus lesen lässt, als ein »clash of civilizations« im Sinne Huntingtons. Die Literatur führt vor, dass die Lösung weder im fröhlichen Nebeneinander noch im reinen Gegeneinander gesucht werden muss, sondern in einem Raum zwischen Ähnlichkeit und Differenz, zwischen Konflikten und Annäherung, wie am Beispiel von Franz Kafkas Erzählung »Beim Bau der chinesischen Mauer« gezeigt wird.

*Galin Tihanov* greift ein anderes Konzept auf, das des Kosmopolitismus: In seinem Beitrag geht er zunächst den Legitimationsstrategien des Kosmopolitismus nach, um in einem nächsten Schritt zu zeigen, wie die Politische Theorie und die Vergleichende Literaturwissenschaft damit umgehen. Aufgrund verschiedener Konzepte des Kosmopolitismus kommt Tihanov zu dem Schluss, dass Kosmopolitismus die Entwicklung einer Polis begleiten kann, aber nicht muss, dass er aber

---

11 Welsch, in diesem Band: 30.

12 Welsch, in diesem Band: 38.

auf jeden Fall ein Indikator der Bewegungen einer Polis ist. Das erste Beispiel ist Kants Aufsatz »Zum ewigen Frieden« (und sein diskursives Umfeld) vor dem Hintergrund der Entstehung eines deutschen Nationalgefühls, wo deutlich wird, dass Nationalismus und Kosmopolitismus als zwei parallele Strömungen begriffen wurden, die einander nicht ausschließen. Das zweite Beispiel ist das Konzept der Weltliteratur (und das der Vergleichenden Literaturwissenschaft), »in dessen Rahmen die Literatur als Möglichkeit verstanden wird, über den Kosmopolitismus und sein komplexes Zusammenspiel mit dem Nationalismus nachzudenken«.<sup>13</sup>

Tihanovs Überlegungen zur Weltliteratur vor dem Hintergrund des Kosmopolitismus werden in *Annette Werbergers* Aufsatz über Weltliteratur aus einer anderen Perspektive betrachtet, denn darin geht es um eine »Literaturgeschichtsschreibung als Verflechtungsgeschichte«.<sup>14</sup> Beschrieben werden »asymmetrische Kulturbeziehungen und interkontinentale literarische Verflechtungen«.<sup>15</sup> Werberger zeigt neue Möglichkeiten der Literaturgeschichtsschreibung, transkulturelle Phänomene in den Blick zu nehmen, und stellt in ihrem Beitrag Ansätze vor, die versuchen, über die nationalhistorische Beschreibung von Literatur hinaus zu gehen, so dass sowohl Bindestrich-Literaturen als auch orale Kulturen Eingang in einen neuen, transkulturellen Kanon finden. Am Beispiel Galiziens – einem traditionell transkulturellen Raum – zeigt sie, wie eine solche transkulturelle Literaturgeschichtsschreibung funktionieren kann.

In *Teil II* geht es um die *Realisierungen* transkultureller Konzepte in den verschiedenen Disziplinen: in der Religionswissenschaft, der Erziehungswissenschaft und im Bereich des Rechts; abschließend wird ein konkretes Projekt der Auswärtigen Kulturpolitik vorgestellt. *Bernhard Maiers* Beitrag befasst sich, ausgehend von den transkulturellen Bewegungen eines Karostoffes (*plaid* oder *tartan*), mit dem Fortleben heidnischer Vorstellungen im Christentum; untersucht wird diese Frage am Beispiel der altirischen Erzählung *Echtrae Chonnlaí* (*Connlaes abenteuerliche Fahrt*) aus dem 8. Jahrhundert. Transkulturalität ist hier eher zeitlich als räumlich gespannt, wenn nachgewiesen wird, dass in dieser christlichen Erzählung zeitlich weit entfernte Versatzstücke aus

---

13 Tihanov, in diesem Band: 89f.

14 Werberger, in diesem Band: 109.

15 Werberger, in diesem Band: ebd.

heidnischen Mythen zu finden sind, so dass das Ergebnis ein kulturelles und historisches Hybrid ist.

S. Karin Amos und Rainer Treptow untersuchen Heterogenität und Ambivalenz im Bereich der Erziehungswissenschaft. Der Beitrag besteht aus zwei Teilen, der erste Teil eröffnet eine historische Dimension, indem er am Beispiel Schule zeigt, wie in einer Zeit, in der der Nationalstaat zum »nahezu alternativlosen Organisationsmodell«<sup>16</sup> wird, mit Heterogenität, Ambivalenz und Eindeutigkeit umgegangen wurde; der zweite Teil geht der Frage am Beispiel der Familienberatung nach, um zu zeigen, dass Heterogenität und Ambivalenz als Unsicherheitsfaktoren empfunden werden. Ausgehend von diesem konkreten Beispiel skizziert Treptow die Problematik, aber auch die Chancen, die sich zwischen einem Zuviel an Möglichkeiten und einer kulturellen Eindeutigkeit für die Erziehung eröffnen.

In Joachim Vogels Beitrag geht es um die Internationalisierung, Europäisierung und Transkulturalisierung des Strafrechts: »Einerseits standen und stehen nationale Strafrechtsordnungen seit je her im Austausch miteinander, und es kam und kommt zu »Rechtstransplantaten« (>legal transplants<) [...] Andererseits schreitet die externe Vernetzung nationaler Strafrechtsordnungen immer stärker voran«, so der Befund.<sup>17</sup> Ausgehend von verschiedenen nationalen »Strafrechtskulturen« werden darin enthaltene transkulturelle Phänomene aufgezeigt, um schließlich das supranationale Strafrecht (Völkerstrafrecht) in den Blick zu nehmen. Mit Rückbezug auf die Theorie des Philosophen Otfried Höffe formuliert Vogel einen Ausblick auf eine »internationale Strafrechtskultur«, die auf den »kulturoffenen interpretierten universellen oder zumindest regional, z.B. in Europa, anerkannten Menschenrechte[n]« basiert.<sup>18</sup>

Ronald Grätz stellt ein Beispiel aus der transkulturellen Praxis vor: das Musikprojekt »Lisboa – Maputo – Berlin«, das das »Überlebensprojekt«, wie Grätz die »kulturelle Beschäftigung mit anderen Kulturen« nennt,<sup>19</sup> praktisch umzusetzen versuchte und als eine »Plattform für Transkulturalität«<sup>20</sup> fungierte. Um herauszufinden, ob mit den

---

16 Amos/Treptow, in diesem Band: 166.

17 Vogel, in diesem Band: 196f.

18 Vogel, in diesem Band: 214.

19 Grätz, in diesem Band: 220.

20 Grätz, in diesem Band: 221.

Künstlern auch die Kunst migriert und wie die Kunst des Herkunfts mit dem Zielland in einen Dialog traten, wurde auf Initiative des Goethe-Instituts und unter der Leitung der Berliner Musikerin Céline Rudolph in Lissabon eine Band zusammengestellt, deren Mitglieder aus dem lusophonen Afrika kamen und die in Lissabon lebten und arbeiteten. Dabei zeigte sich, dass es den Musikern weniger darum ging, über ihre (transkulturelle) Kunst zu reflektieren als diese Kunst zu machen.

*Teil III* widmet sich einer »transkulturellen Literatur«, womit Literatur gemeint ist, die sich explizit mit dem Anderen auseinander setzt und dieses Andere reflektiert, denn tentativ ließe sich formulieren, dass Literatur – wie Kunst überhaupt – immer schon transkulturell ist. Dabei geht es um Literatur in einem Raum, der traditionell transkulturell ist (Zentraleuropa), um eine (literarische) Reise des Orients in den Westen, bei dem ein kulturelles Konzept mit einem ästhetischen verschränkt wird (T.S. Eliot), und um neueste amerikanisch-arabische Kulturbewegungen. *Renata Makarska* bezieht sich in ihrem Aufsatz auf zeitgenössische Literatur in Zentraleuropa und stellt Autoren vor, die diesen Raum unterschiedlich wahrnehmen, sei es als »familiäres Europa« (Czesław Miłosz), als eine Art kulturelles Manifest (Jurij Andruchovyč), als Raum der »amputierten Erinnerung« (Andrzej Zawada) oder als einen vom »Mythos Kakanien« geprägten Raum mit dem Recht auf Differenz (Michal Hvorecký).

*Lars Eckstein* und *Günter Leypoldt* nehmen eine Neulektüre von T.S. Eliots Gedicht *Journey of the Magi* von 1927 vor, das meist entweder aus biographischer Perspektive oder als Thematisierung spiritueller Übergänge gedeutet wird. Eckstein und Leypoldt dagegen lesen *Journey of the Magi* als »eine Geschichte über kulturelle Begegnungen und Zwischenräume [...], die zentral für kulturwissenschaftliche Theorien des Transkulturellen sind«. <sup>21</sup> Dabei liegt der Clou ihrer Interpretation der Reise der drei Weisen aus dem Morgenland in den Westen darin, dass sie die Transkulturalität mit dem Erhabenen verbinden: Schrecken und Ekstase, Fluch und Ermächtigung sind in der transkulturellen Begegnung (und in Eliots Gedicht) zu finden, was vor einem Theoriehorizont, der u.a. Edmund Burke, Paul Gilroy und Homi Bhaba umfasst, dargelegt wird. Zum Schluss der Analyse gelangen Eckstein und Leypoldt in einer Wendung vom Transkulturell-Erhabenen zum Transkulturell-Banalen.

---

21 Eckstein/Leypoldt, in diesem Band: 263.



*Markus Schmitz* zeichnet ein diskursives Feld arabisch-angloamerikanischer literarischer Beziehungen, die er bis zu einem Roman von Ameen Rihani aus dem Jahr 1911 zurück verfolgt. Im Zentrum aber stehen die audio-visuellen und literarischen Arbeiten dreier arabisch-amerikanischer zeitgenössischer Künstler (bzw. zweier Künstler und einer Künstlerin). Im Rückgriff auf das von Linda Basch, Nina Glick-Schiller und Cristina Szanton-Blan eingebrachte Konzept der Transmigration geht es Schmitz darum, das ideologiekritische Potential transmigrantischer Kunst sichtbar zu machen.

\*\*\*

Unser Dank geht an die Autoren und Autorinnen dieses Buches, an das Ministerium für Wissenschaft, Forschung und Kunst Baden-Württemberg, das den Druck finanziell unterstützt, und an den transcript Verlag für die Betreuung des Bandes. Katharina List und Eduard Voll haben den Band redaktionell bearbeitet und eingerichtet, unterstützt wurden sie dabei von Sara Bangert, Anja-Simone Michalski und Claudia Zilk. Ihnen danken wir ganz besonders.

## LITERATUR

- Bachmann-Medick, Doris (2006): *Cultural Turn. Neuorientierungen in den Kulturwissenschaften*. Hamburg.
- De Certeau (1988): »Berichte von Räumen«. In: Ders.: *Kunst des Handelns*. Berlin, 215-238.
- Foucault, Michel (2005): »Von anderen Räumen« [1967/1984]. In: Ders.: *Schriften in vier Bänden. Dits et écrits*, Bd. 4. Hg. v. Daniel Defert und François Ewald. Übers. v. Michael Bischoff u.a. Frankfurt a. M., 931-942.
- Gaider, Thomas (2009): »Weltliteratur in der Perspektive einer Longue Durée II: Die Ökumene des swahili-sprachigen Ostafrika«. In: Özkan Ezli/Dorothee Kimmich/Annette Werberger (Hg.): *Wider den Kulturenzwang. Migration, Kulturalisierung und Weltliteratur*. Bielefeld, 361-401.
- Gilroy, Paul (2004): »Der *Black Atlantic*«. In: Haus der Kulturen der Welt (Hg.): *Der Black Atlantic*. Berlin, 12-32.

- Glick Schiller, Nina/Basch, Linda/Blanc-Szanton, Christina (1997): »Transnationalismus: Ein neuer analytischer Rahmen zum Verständnis von Migration«. In: Heinz Kleger (Hg.): *Transnationale Staatsbürgerschaft*. Frankfurt a. M./New York, 81-105.
- Lotman, Juriĭ (2010): *Die Innenwelt des Denkens: Eine semiotische Theorie der Kultur*. Hg. von Susi K. Frank/Cornelia Ruhe/Alexander Schmitz. Übersetzt von Gabriele Leupold/Olga Radetzkaja. Frankfurt a. M.
- Ortiz, Fernando (1973 [1940]): *Contrapunteo cubano del tabaco y azúcar*. Barcelona.
- Pratt, Mary Louise (1992): *Imperial Eyes: Travel Writing and Transculturation*. London
- Schlögel, Karl (2003): *Im Raume lesen wir die Zeit. Über Zivilisationsgeschichte und Geopolitik*. München/Wien.
- Schroer, Markus (2006): *Räume, Orte, Grenzen. Auf dem Weg zu einer Soziologie des Raumes*. Frankfurt a. M.
- Soja, Edward W. (1991): »Geschichte: Geographie: Modernität«. In: Martin Wentz (Hg.): *Stadt-Räume*. Frankfurt a. M./New York, 73-90.
- Spivak, Gayatri Chakravorty (2003): »Crossing Borders«. In: Dies.: *Death of a Discipline*. New York, 1-23.
- Welsch, Wolfgang (1999): »Transculturality: The Puzzling Form of Cultures Today«. In: Mike Featherstone/Scott Lash (Hg.): *Spaces of Culture. City, Nation, World*. London/New Delhi, 194-213.
